# Supplementary material for: Determinants of plasma levels of proglucagon and the metabolic impact of glucagon receptor signalling: a UK Biobank study
Source: Springer Nature journal article supplement (doi:10.1007/s00125-024-06160-1), 2024-05-06
Supplement: MOESM1 [file 27060692]

## Electronic Supplementary Material (ESM)

### Determinants of plasma levels of proglucagon and the metabolic impact of glucagon receptor signalling: a UK Biobank study

Marie Winther-Sørensen, Sara L. Garcia, Andreas Bartholdy, Maud Eline Ottenheim, Karina Banasik, Søren Brunak, Charlotte M. Sørensen, Lise Lotte Gluud, Filip K. Knop, Jens Juul Holst, Mette M. Rosenkilde, Majken K. Jensen, Nicolai J. Wewer Albrechtsen

*Diabetologia* (2024)

**ESM Table 1**

UK Biobank covariates used in the study.

| Covariables                             | Definitions                                                                                                                                                                                                                                    | UKB data field |
|-----------------------------------------|------------------------------------------------------------------------------------------------------------------------------------------------------------------------------------------------------------------------------------------------|----------------|
| <b>Age</b>                              | Age when attended the assessment center at the initial assessment, truncated to a full year.                                                                                                                                                   | 21003          |
| <b>Sex</b>                              | Acquired from central registry at recruitment.                                                                                                                                                                                                 | 31             |
| <b>Race</b>                             | Categorical variable, white and non-white. Indicates samples who self-identified as 'White British' at the initial touchscreen questionnaire and have very similar genetic ancestry based on a principal components analysis of the genotypes. | 22006          |
| <b>Body mass index (BMI)</b>            | Weight/height <sup>2</sup> , kg/m <sup>2</sup> . BMI when attended the assessment center at the initial assessment.                                                                                                                            | 21001          |
| <b>Liver fat</b>                        | %. Proton density fat fraction measured by MRI scan at instance 2.                                                                                                                                                                             | 40061          |
| <b>Date attending assessment center</b> | Date of attending assessment centre.                                                                                                                                                                                                           | 53             |
| <b>Date of death</b>                    | Date of death. Acquired from central registry.                                                                                                                                                                                                 | 40000          |
| <b>Date lost to follow up</b>           | Date lost to follow-up. This data was last updated in May 2017.                                                                                                                                                                                | 191            |

|                                   |                                                                                                                                                                                                  |                                                 |
|-----------------------------------|--------------------------------------------------------------------------------------------------------------------------------------------------------------------------------------------------|-------------------------------------------------|
| <b>Sex chromosome aneuploidy</b>  | Samples which were identified as putatively carrying sex chromosome configurations that are not either XX or XY                                                                                  | 22019                                           |
| <b>HbA<sub>1c</sub></b>           | Baseline HbA <sub>1c</sub> levels, mmol/mol                                                                                                                                                      | 30750                                           |
| <b>Glucose</b>                    | Baseline glucose measurement, mmol/l                                                                                                                                                             | 30740                                           |
| <b>Weekly alcohol consumption</b> | Calculated as the sum of beer, cider, champagne, white wine, red wine, fortified wine, spirits, and other alcoholic drinks.                                                                      | 1588, 1578, 1608, 5364, 1568, 1598              |
| <b>Amino acids</b>                | Plasma levels of amino acids measured by NMR metabolomics                                                                                                                                        | 23460, 23461, 23462, 23463, 23465, 23466, 23467 |
| <b>Proteomics</b>                 | Only available through the Research Analysis Platform. A list of field names is available at <a href="https://github.com/nicwin98/UK-Biobank-GCG">https://github.com/nicwin98/UK-Biobank-GCG</a> |                                                 |
| <b>Medication</b>                 | A list of diabetes medications is provided in ESM table 4.                                                                                                                                       | 20003                                           |

**ESM Table 2**

Mutations in the glucagon receptor included in the Frameshift variants group

| Frameshift mutations                                 |          |                       |
|------------------------------------------------------|----------|-----------------------|
| Chrom_pos_ref_alt                                    | <i>n</i> | Sequence Ontology     |
| chr17_81809019_A_G                                   | 1        | start lost            |
| chr17_81809021_GC_G                                  | 2        | frameshift truncation |
| chr17_81809027_CT_C                                  | 1        | frameshift truncation |
| chr17_81809039_G_GCGACC                              | 1        | frameshift elongation |
| chr17_81809040_C_T                                   | 5        | stop gained           |
| chr17_81809045_CCT_C                                 | 22       | frameshift truncation |
| chr17_81809064_C_CTGCT                               | 33       | frameshift elongation |
| chr17_81809838_C_A                                   | 1        | stop gained           |
| chr17_81810872_AC_A                                  | 1        | frameshift truncation |
| chr17_81810888_CG_C                                  | 3        | frameshift truncation |
| chr17_81810897_TCTC_T                                | 5        | inframe deletion      |
| chr17_81810907_CT_C                                  | 40       | frameshift truncation |
| chr17_81811122_TG_T                                  | 1        | frameshift truncation |
| chr17_81811273_T_TACA                                | 1        | inframe insertion     |
| chr17_81811283_CCCTGGGGGCCCTGCTCCTCGCCTTGGCCA<br>T_C | 12       | inframe deletion      |
| chr17_81811286_TG_T                                  | 3        | frameshift truncation |
| chr17_81811293_C_GT                                  | 1        | frameshift elongation |
| chr17_81811316_TG_T                                  | 1        | frameshift truncation |
| chr17_81811316_T_TG                                  | 14       | frameshift elongation |
| chr17_81811407_G_GCTGCA                              | 2        | frameshift elongation |
| chr17_81811422_CA_C                                  | 1        | frameshift truncation |
| chr17_81811441_CTGTT_C                               | 1        | frameshift truncation |
| chr17_81811710_C_A                                   | 6        | stop gained           |
| chr17_81811751_T_TG                                  | 1        | frameshift elongation |
| chr17_81811887_TGCCCC_T                              | 3        | frameshift truncation |
| chr17_81811911_CT_C                                  | 1        | frameshift truncation |
| chr17_81811923_CAAGT_C                               | 2        | frameshift truncation |
| chr17_81812181_AG_A                                  | 1        | frameshift truncation |
| chr17_81812216_G_A                                   | 8        | stop gained           |
| chr17_81812248_TC_T                                  | 1        | frameshift truncation |

|                       |    |                       |
|-----------------------|----|-----------------------|
| chr17_81812579_C_CA   | 5  | frameshift elongation |
| chr17_81812581_ACTT_A | 47 | inframe deletion      |
| chr17_81812598_CG_C   | 1  | frameshift truncation |
| chr17_81812607_C_T    | 2  | stop gained           |
| chr17_81812838_CT_C   | 1  | frameshift truncation |
| chr17_81812929_TC_T   | 1  | frameshift truncation |
| chr17_81813477_C_T    | 1  | stop gained           |
| chr17_81813509_G_A    | 3  | stop gained           |
| chr17_81813529_G_A    | 8  | stop gained           |
| chr17_81813609_AG_A   | 2  | frameshift truncation |
| chr17_81813624_C_T    | 15 | stop gained           |
| chr17_81813647_CT_C   | 1  | frameshift truncation |

**ESM Table 3**

Definition of diseases

| <b>Disease</b>                  | <b>Definitions</b>                                                                                                                                                                                                                                                                                                                                                                                                                                                                                                                                                                                                                                                                                                                                                                                                                                                                                                                                           | <b>UKB data field</b>                           |
|---------------------------------|--------------------------------------------------------------------------------------------------------------------------------------------------------------------------------------------------------------------------------------------------------------------------------------------------------------------------------------------------------------------------------------------------------------------------------------------------------------------------------------------------------------------------------------------------------------------------------------------------------------------------------------------------------------------------------------------------------------------------------------------------------------------------------------------------------------------------------------------------------------------------------------------------------------------------------------------------------------|-------------------------------------------------|
| <b>Baseline type 2 diabetes</b> | Categorical variable. Cases were defined as probable and possible type 2 diabetes, and controls were defined as unlikely diabetes based on the Eastwood algorithm.                                                                                                                                                                                                                                                                                                                                                                                                                                                                                                                                                                                                                                                                                                                                                                                           |                                                 |
| <b>Incident type 2 diabetes</b> | Categorical variable. First, T2D was defined using ICD-10 codes for diabetes: E11 (“type 2 diabetes mellitus”) and E14 (“unspecified diabetes mellitus”) and the dates for the diagnosis ( $n = 3585$ ). To refine the categorization further, the following steps were implemented: <ol style="list-style-type: none"> <li>1. Individuals additionally diagnosed with E10 (“type 1 diabetes mellitus”) were removed from T2D (<math>n = 360</math>).</li> <li>2. Individuals with probably and possibly type 2 diabetes based on the Estwood algorithm were removed from T2D (<math>n = 1370</math>).</li> <li>3. Individuals with ICD10 code of T2D given prior to the baseline were removed from T2D (<math>n = 304</math>).</li> <li>4. Individuals with baseline HbA1c <math>&gt; 48</math> mmol/mol were removed from T2D (<math>n = 159</math>).</li> </ol> This classification process resulted in 1,562 incident cases of T2D (893 men, 658 women). | 130708<br>130714<br>41270<br>30750              |
| <b>MASLD</b>                    | Categorical variable. Cases were defined as $> 5.5\%$ fat on MRI PDFF and an alcohol consumption $< 30$ g/day for men and $< 20$ g/day for women. Individuals with MRI PDFF $> 5.5\%$ and an alcohol consumption $> 30$ g/day for men and $> 20$ g/day for women were excluded from the control group.                                                                                                                                                                                                                                                                                                                                                                                                                                                                                                                                                                                                                                                       | 40061, 1588, 1578,<br>1608, 5364, 1568,<br>1598 |
| <b>Obesity</b>                  | Categorical variable. Cases were defined as BMI $> 30$ and controls as BMI $< 25$ .                                                                                                                                                                                                                                                                                                                                                                                                                                                                                                                                                                                                                                                                                                                                                                                                                                                                          | 21001                                           |

#### ESM Table 4

List of medication codes for type 2 diabetes drugs (data field 20003, baseline visit). The list can be downloaded from the UK Biobank website <https://biobank.ctsu.ox.ac.uk/crystal/coding.cgi?id=4>.

| Medication                  | Medication code                                                                                                                 |
|-----------------------------|---------------------------------------------------------------------------------------------------------------------------------|
| Metformin                   | 1140884600, 1140874686, 1141189090                                                                                              |
| Insulin                     | 1140883066                                                                                                                      |
| Sulfonylureas               | 1140874718, 1140874744, 1140874746,<br>1141152590, 1141156984, 1140874646,<br>1141157284, 1140874652, 1140874674,<br>1140874728 |
| Other (acerbose, glucotard) | 1140868902, 1140868908, 1140857508                                                                                              |
| Meglitinides                | 1141173882, 1141173786, 1141168660                                                                                              |
| Glitazones                  | 1141171646, 1141171652, 1141153254,<br>1141177600, 1141177606                                                                   |
| Non-metformin OADs          | The combination of sulfonylureas, other,<br>meglitinides, and glitazones                                                        |

#### ESM Table 5

Baseline characteristics of the UK Biobank cohort and the sub-cohort included in the proteomics analysis. Prevalent type 2 diabetes (T2D) was defined from the Eastwood algorithm [1].

| Characteristic                            | UKB cohort        | Proteomics sub-cohort |
|-------------------------------------------|-------------------|-----------------------|
| N                                         | 408,931           | 40,158                |
| Male sex                                  | 187,863<br>(45.9) | 18,585 (46.3)         |
| Age                                       | 56.9 (8)          | 57.2 (8.1)            |
| BMI (kg/m <sup>2</sup> ) <sup>a</sup>     | 27.4 (4.8)        | 27.4 (4.7)            |
| Prevalent T2D                             | 17,719 (4.3)      | 1842 (4.6)            |
| Liver fat (%)* <sup>a</sup>               | 4.8 (4.9)         | 4.8 (4.8)             |
| HbA <sub>1c</sub> (mmol/mol) <sup>a</sup> | 36 (6.5)          | 36.1 (6.7)            |

Continuous variables are presented as mean (SD) and categorical variables as n (%)

\*Liver fat was quantified as MRI-PDFF at the second repeat (imaging) visit (median time from enrolment visit: 10.5 years).

<sup>a</sup>Missing data were present for BMI: a)  $n=1294$  (0.3%), b)  $n=160$  (0.4%); Liver fat: a) 384,507 (91.6%), b) 35,910 (89.4%); HbA<sub>1c</sub>: a)  $n=19,135$  (4.7%), b) 1812 (4.5%).

### ESM Figure 1

Effect of type 2 diabetes drugs on the association between type 2 diabetes and plasma proglucagon.

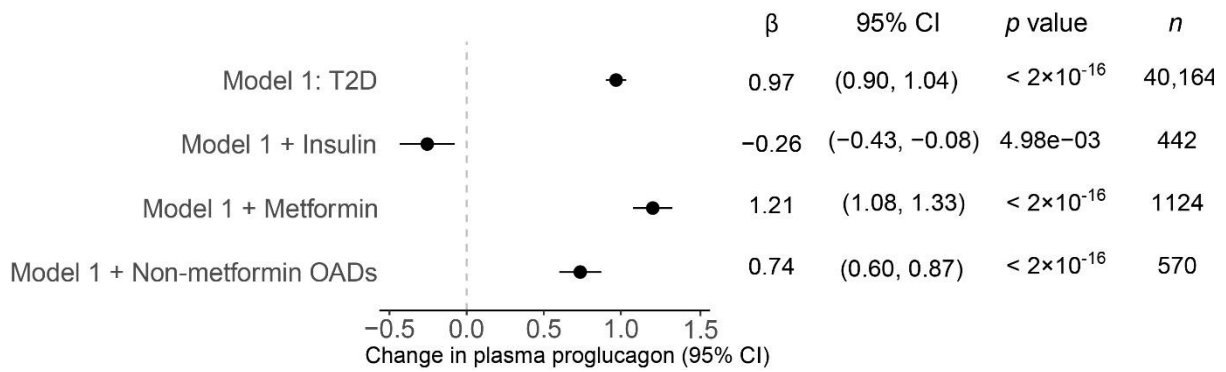

Multiple linear regression analyses with plasma proglucagon as the dependent variable and T2D as the independent variable. Model 1 was adjusted for age, sex, fasting time, and plasma creatinine. The additional co-factor in each of the remaining models are indicated in the figure (insulin, metformin, and non-metformin oral anti-diabetic drugs (OAD)). CI, 95% confidence intervals; T2D, type 2 diabetes.

## References

1. Eastwood, S.V., et al., *Algorithms for the Capture and Adjudication of Prevalent and Incident Diabetes in UK Biobank*. PLOS ONE, 2016. **11**(9): p. e0162388.
